# Supplementary material
Source: ML conference proceedings conference paper supplement (https://openreview.net/forum?id=XWYv4BNShP)
Supplement: supplementary_material [file attachment]

## 367 A Experiment Details

368 All experiments unless otherwise stated present the average/standard deviations of  $n = 3$  runs. Each  
 369 run consists of a random subset of MNIST 0/1 digits for MNIST binary classification, or random  
 370 positions of sampled datapoints for synthetic data, and different samples from the GP for the Gaussian  
 371 Random Field experiment. Distilled datasets are initialized as subsets of the original training data.  
 372 We distill for 20000 iterations with Adam optimizer with a learning rate of 0.002 optimizing both  
 373 images/data positions and labels. We use full batch gradient descent for the synthetic datasets and a  
 374 maximum batch size of 2000 for the MNIST experiment. For the MNIST experiment we found that  
 375 particularly for larger values of  $n$ , with minibatch training, we could obtain lower distillation losses  
 376 by optimizing for longer, so the closing of the gap between the upper bound and experiment values in  
 377 fig. 4 may be misleading: longer optimization could bring the actual distillation loss lower.

378 To ensure that assumption (II) is fulfilled, we scale the labels such that  $\|f_{[\mathbf{x}, y, k]}^\lambda\|_{\mathcal{H}} = 1$ . For  
 379 example, if we are working with MNIST binary classification, with labels  $\{+1, -1\}$ , we first  
 380 compute  $\|f_{[\mathbf{x}, y, k]}^\lambda\|_{\mathcal{H}} = r$  using  $\{+1, -1\}$  labels, then rescale the labels by  $1/r$  so that the labels are  
 381  $\{+\frac{1}{r}, -\frac{1}{r}\}$ . Suppose this results in some upper bound  $\mathcal{L}_U$  and some real distillation loss  $\mathcal{L}_R$ . For  
 382 the corresponding plots in figs. 2 to 4, we plot  $r^2\mathcal{L}_U$  and  $r^2\mathcal{L}_R$ . We do this because the  $r$  values for  
 383 different parameters (such as  $n$  or  $\sigma_x$ ) could be different, and scaling for the plots allows the values  
 384 to be comparable.

385 In the figures for the upper bounds on the distillation loss we plot the smallest value of the upper  
 386 bounds in remark 6.

### 387 A.1 Code

388 Code is available in the supplementary material.
